# Supplementary material for: NMDARs Drive the Expression of Neuropsychiatric Disorder Risk Genes Within GABAergic Interneuron Subtypes in the Juvenile Brain
Source: PubMed Central journal article supplement (PMC8500094; doi:10.3389/fnmol.2021.712609), 2021-09-14
Supplement: Presentation_1.pdf [file Presentation_1.pdf]

# **NMDARs drive the expression of neuropsychiatric disorder risk genes within GABAergic interneuron subtypes in the juvenile brain**

Vivek Mahadevan<sup>1\*</sup>, Apratim Mitra<sup>2</sup>, Yajun Zhang<sup>3</sup>, Xiaoqing Yuan<sup>1</sup>, Areg Peltekian<sup>1</sup>, Ramesh Chittajallu<sup>1</sup>, Caroline Esnault<sup>2</sup>, Dragan Maric<sup>4</sup>, Christopher Rhodes<sup>3</sup>, Kenneth A. Pelkey<sup>1</sup>, Ryan Dale<sup>2†</sup>, Timothy J. Petros<sup>3‡</sup> & Chris J. McBain<sup>1§¶</sup>

<sup>1</sup>Section on Cellular and Synaptic Physiology, Eunice Kennedy Shriver National Institute of Child Health and Human Development (NICHD), Bethesda, 20892, MD, USA

<sup>2</sup>Bioinformatics and Scientific Programming Core, NICHD, Bethesda, 20892, MD, USA

<sup>3</sup>Unit on Cellular and Molecular Neurodevelopment, NICHD, Bethesda, 20892, MD, USA

<sup>4</sup>Flow and Imaging Cytometry Core Facility, National Institute of Neurological Disorders and Stroke (NINDS), Bethesda, 20852, MD, USA.

\*E-mail: [vivek.mahadevan@nih.gov](mailto:vivek.mahadevan@nih.gov)

†E-mail: [ryan.dale@nih.gov](mailto:ryan.dale@nih.gov)

‡E-mail: [tim.petros@nih.gov](mailto:tim.petros@nih.gov)

§Corresponding author:

¶E-mail: [mcbainc@mail.nih.gov](mailto:mcbainc@mail.nih.gov)

## Supplementary Figure Legends

### FIGURE1, SUPP1 | Schematic overview and quality control for scRNAseq

**A**, Breeding strategy, **B<sub>i</sub>**, **C<sub>i</sub>**, **D<sub>i</sub>**, **E<sub>i</sub>**, Representative FACS gates to sequentially isolate live: dead cells using DAPI: DRAQ5 staining, singlet-gating and TdT<sup>+</sup>-reporter gating to obtain reporter-positive MGE-derived interneurons from frontal neocortex and hippocampus. **B<sub>ii</sub>**, **C<sub>ii</sub>**, **D<sub>ii</sub>**, **E<sub>ii</sub>**, Barcode Rank Plots for cells from WT and NULL mice, demonstrating separation of cell-associated barcodes and those associated with empty partitions. UMI, unique molecular identifier; MR, Mean Reads; MG, Median Genes. **B<sub>iii</sub>**, **C<sub>iii</sub>**, **D<sub>iii</sub>**, **E<sub>iii</sub>**, Distributions of the total number of genes, percentage of mitochondrial genes and UMIs per cell in control mice. **B<sub>iv</sub>**, **C<sub>iv</sub>**, **D<sub>iv</sub>**, **E<sub>iv</sub>**, Pearson correlation coefficient of the distributions of the total number of genes and the UMI

**FIGURE1, SUPP2 | Biological replicates**

Representative UMAP plots of the 3 biological replicates from neocortex and hippocampus indicates **A**, similar clustering, and **B**, similar expression profiles of *Nkx2.1*-derived, *Gad1*-expressing MGE-derived interneurons and *Nkx2.1* derived, *Olig1*-expressing oligodendrocytes.

**FIGURE1, SUPP3 | Select marker gene expression across the subtypes of merged cortical and hippocampal MGE-*Grin1*<sup>wt/wt</sup>**

**A<sub>i</sub>**, UMAP representation of cardinal MGE markers genes in the cortical and hippocampal merged dataset.

**A<sub>ii</sub>**, UMAP representation colored by region, highlighting the region-specific enrichments of MGE subsets.

**A<sub>iii</sub>**, Pie chart indicating the percentages of cells recovered across the interneuron subtypes from neocortex and the hippocampus. **B**, Violin plot showing the distribution of expression levels of well-known

representative cell-type-enriched marker genes across the 11 MGE subtypes.

**FIGURE1, SUPP4 | MGE-derived interneuron subtype differences between neocortex and hippocampus**

Volcano plot representing the  $-\log_{10}$  False Discovery Rate (FDR) versus  $\log_2$  fold change (FC) between **A**, TH-expressing MGE subsets and the remaining MGE subset SST, PVALB and NGFC; **B**, Differential expression of the cardinal MGE classes between neocortex and hippocampus, at a fold change  $\geq 0.5$  and FDR  $< 10e-5$ .

**FIGURE1, SUPP5 | MGE-derived interneuron subtype annotation based on marker expression**

**A**, Table indicating the subtype-defining marker genes observed in the present study and their descriptions in the previous scRNAseq datasets (\*indicates the genes expressed in the cortex-exclusive PVALB.2 subcluster). Representative UMAP plots of MGE subtype-enriched genes in **B**, SST subclusters, **C**, NGFC subclusters, and **D**, PVALB subclusters.

**FIGURE2, SUPP1 | Validation of MGE subtype abundances subsequent to *Grin1*-ablation by immunostaining**

**A**, Boxplots indicating the cell counts of MGE-derived interneurons expressing **(Ai)** Ai14/tdTomato, **(Aii)** PV, SST immunostaining from P30 somatosensory neocortex of *Grin1<sup>wt/wt</sup>* and *Grin1<sup>fl/fl</sup>*. **B**, Boxplots indicating the cell counts of hippocampal MGE-derived interneurons expressing **(Bi)** Ai14/tdTomato, and **(Bii)** PV, SST immunostaining from P30 *Grin1<sup>wt/wt</sup>* and *Grin1<sup>fl/fl</sup>*.

**FIGURE2, SUPP2 | scRNAseq differential recoveries of MGE-derived interneuron subtypes**

**A<sub>i</sub>**, Number of cells recovered across cardinal subtypes SST, PV and NGFC. **A<sub>ii</sub>**, Number of cells recovered within the subtypes of PV / SST/ NGFC. **B**, UMAP representation colored by cardinal MGE-derived interneuron subtypes SST, PVALB and NGFC, highlighting the differential enrichments of cells **C**, Representative UMAP plots indicating the granularity among PV/SST/NGFC subtypes between both brain regions and both genotypes.



**FIGURE2, SUPP3 | Select marker gene expression across the subtypes of merged MGE-derived interneurons from *Grin1<sup>wt/wt</sup>* and *Grin1<sup>fl/fl</sup>***

**A**, Violin plot showing the distribution of expression levels of well-known representative cell-type-enriched marker genes across the MGE subtypes. **B<sub>i</sub>**,  $-\log_{10}$  False Discovery Rate (FDR) versus  $\log_2$  fold change (FC) between *Pthlh*-PVALB.2 and *Pthlh*-PVALB.3 at a fold change  $\geq 0.5$  and FDR  $< 10e^{-3}$ . **B<sub>ii</sub>**, Dot plots representing the normalized expressions of NGFC marker genes mis expressed in *Pthlh*-PVALB.3 upon *Grin1*-ablation.

**FIGURE2, SUPP4 | Expression of control genes in the MGE-derived interneuron subtypes subsequent to *Grin1*-ablation**

**A**, Split-violin plot from both genotypes indicating the expression of *Grin1* in the MGE-derived interneurons, pyramidal neurons and non-neurons. **B**, Representative UMAP plots of cardinal MGE markers genes.

**FIGURE4, SUPP1 | Validation of Nkx2.1-expressing interneuron in P25-30 mouse cortex and hippocampus; anti-Nkx2-1 and anti-PV/SST co-immunostaining**

**A<sub>i</sub>**, Representative sagittal section from P25-30 MGE-*Grin1<sup>wt/wt</sup>*-mice immunostained with anti-Nkx2-1 (cyan), and counter-stained with DAPI (blue). While arrow heads in the cortex indicate Nkx2-1 (+) cells in deep and in mid-cortical layers. **A<sub>ii</sub>**, Boxplots indicate the normalized density of cortical vs hippocampal Ai14(+): Nkx2-1(+) double-positive cell counts normalized to total Ai14(+) counts. Representative immunostaining of P25-30 MGE-*Grin1<sup>wt/wt</sup>* brains from **B**, somatosensory cortex or **C<sub>i</sub>**,hippocampus using anti-Nkx2-1 (cyan), DAPI (blue), PV/SST (green) and endogenous Ai14 reporter (red) expression. **C<sub>ii</sub>**, Indicates rare representative example of rare PV(+): Nkx2-1(+) double-positive cells from MGE-*Grin1<sup>fl/fl</sup>* hippocampus. (0 cells from WT, 4 cells from null tissue; n = 3 brains (4 sections) from each genotype for immunostaining); Error bars reflect s.e.m from individual sections; two-tailed unpaired t-test, for statistical analysis.

**FIGURE5, SUPP1 | Differential gene expression in the MGE-derived interneuron subtypes subsequent to *Grin1*-ablation**

**A<sub>i</sub>**, Bar plot denoting the number of genes up/downregulated in the cortical and hippocampal MGE clusters.

Volcano plot representing the  $-\log_{10}$  False Discovery Rate (FDR) versus  $\log_2$  fold change (FC) between

**B**, hippocampal and **C**, cortical MGE cardinal clusters upon *Grin1*-loss, at a fold change  $\geq 0.2$  and FDR  $< 10e-6$ .

**FIGURE5, SUPP2 | Molecular pathways differentially expressed in MGE-derived interneuron subtypes subsequent to *Grin1*-ablation**

**A**, Hierarchical clustering tree summarizing the correlation among significant pathways enriched among the DEGs. Pathways with many shared genes are clustered together. Bigger dots indicate more significant P-values. **B**, Bar plot showing the classification of molecular functions of the DEGs, across the MGE subtypes. Total number of DEGs in the particular molecular class indicated in parentheses.

**FIGURE6, SUPP1 | Differential expression of intracellular signaling cascades across subtypes upon *Grin1*-ablation**

Heatmap of log<sub>2</sub> FC of significant DEGs in cortical and hippocampal MGE cardinal subtypes, showing a subset of **A**, genes regulating intracellular Ca<sup>2+</sup> homeostasis and Ca<sup>2+</sup> binding proteins; **B**, notable second messengers; **C**, Ca<sup>2+</sup> dependent / activated kinases and phosphatases.and, **D**, cellular energetics and mitochondrial function. **E**, Breeding strategy to obtain MGE-derived interneuron-specific expression of Ribotag (*Rpl22<sup>-HA</sup>*) transgene in the background of *Grin1<sup>f/f</sup>* alleles.

**FIGURE7, SUPP1 | Differential expression of fundamental interneuron marker genes across subtypes upon *Grin1*-ablation**

Differential expression of cardinal interneuron marker genes that are broadly expressed across interneurons by **A<sub>i</sub>**, scRNAseq approach, and cross-validated using **A<sub>ii</sub>**, the Ribotag-seq approach.

**FIGURE8, SUPP1 | Aberrant NMDAR-signaling result in misexpression of regulators of membrane excitability that are high-risk Sz genes**

**A**, Schema representing the field of hippocampal pyramidal cell innervated by the interneurons. Heatmap of log<sub>2</sub> FC of significant DEGs in cortical and hippocampal MGE cardinal subtypes, showing a subset of **B<sub>i</sub>**, Neurotransmitter release machinery. **B<sub>ii</sub>**, Postsynaptic GABA / Glutamate receptor complexes, Kcn-, Scn-ion channel complexes and other miscellaneous regulators of excitability.



## List of Supplementary Tables

**Table1A** | List of differentially expressed genes in MGE-interneuron subtypes after *Grin1*-ablation.

**Table1B** | scRNAseq cell number recoveries across different clusters from both *Grin1<sup>wt/wt</sup>* and *Grin1<sup>fl/fl</sup>*.

**Table1C** | scRNAseq cluster marker genes from both *Grin1<sup>wt/wt</sup>* and *Grin1<sup>fl/fl</sup>*.

**Table2** | Intracellular signaling pathways differentially expressed after *Grin1*-ablation.

**Table3** | Differentially enriched disease ontology mapping after *Grin1*-ablation.

**Table4A** | Differentially expressed genes mapped to high-ranked SZDB and SFARI databases.

**Table4B** | All schizophrenia risk genes catalogued in SZDB database.

**Table4C** | All autism risk genes catalogued in SFARI database.

**Table4D** | Protein-protein interaction statistics for disease-annotated genes
